# Supplementary material for: Malaria mosquitoes acquire and allocate cattle urine to enhance life history traits
Source: PubMed Central journal article supplement (PMC9188207; doi:10.1186/s12936-022-04179-6), 2022-06-11
Supplement: 12936_2022_4179_MOESM1_ESM.pdf [file 12936_2022_4179_MOESM1_ESM.pdf]

## Supporting Information

### **Malaria mosquitoes acquire and allocate cattle urine to enhance life history traits**

Supporting Tables: 2

Supporting Figures: 3

**Supporting Table 1**

|                                             |                             | Host-seeking | Blood fed | Semi-gravid | Gravid | Males |
|---------------------------------------------|-----------------------------|--------------|-----------|-------------|--------|-------|
| CDC light traps                             | <i>Anopheles arabiensis</i> | 466          | 154       | 30          | 71     | 29    |
|                                             | <i>Anopheles pharoensis</i> | 141          | 25        | 14          | 23     | 5     |
|                                             | <i>Culex</i> spp.           | 562          | 100       | 19          | 17     | 9     |
| CDC light traps baited with synthetic blend | <i>Anopheles arabiensis</i> | 879          | 363       | 85          | 109    | 37    |
|                                             | <i>Anopheles pharoensis</i> | 471          | 123       | 29          | 62     | 26    |
|                                             | <i>Culex</i> spp.           | 757          | 164       | 22          | 57     | 12    |

**Supporting Table 2.**

| Compound               | Compound class           | CAS No.    | Purity (%) | Supplier      |
|------------------------|--------------------------|------------|------------|---------------|
| 2-ethyl-1-hexenol      | aliphatic alcohol        | 104-76-7   | 99         | Sigma-Aldrich |
| decanal*               | aliphatic aldehyde       | 112-31-2   | 98         | Sigma-Aldrich |
| 3-nonen-2-one          | aliphatic ketone         | 18402-83-0 | 95         | Sigma-Aldrich |
| 2-cyclohexen-1-one*    | cyclic, aliphatic ketone | 930-68-7   | 96         | VWR           |
| phenol*                | aromatic alcohol         | 108-95-2   | 99.5       | Sigma-Aldrich |
| <i>m</i> -cresol*      | aromatic alcohol         | 108-39-4   | 97         | Sigma-Aldrich |
| <i>p</i> -cresol*      | aromatic alcohol         | 106-44-5   | 99         | Sigma-Aldrich |
| 4-ethylphenol          | aromatic alcohol         | 123-07-9   | 99         | Sigma-Aldrich |
| <i>S</i> -(-)-limonene | monoterpenic hydrocarbon | 5989-54-8  | 95         | Sigma-Aldrich |
| linalool*              | monoterpenic alcohol     | 78-70-6    | 97         | Sigma-Aldrich |

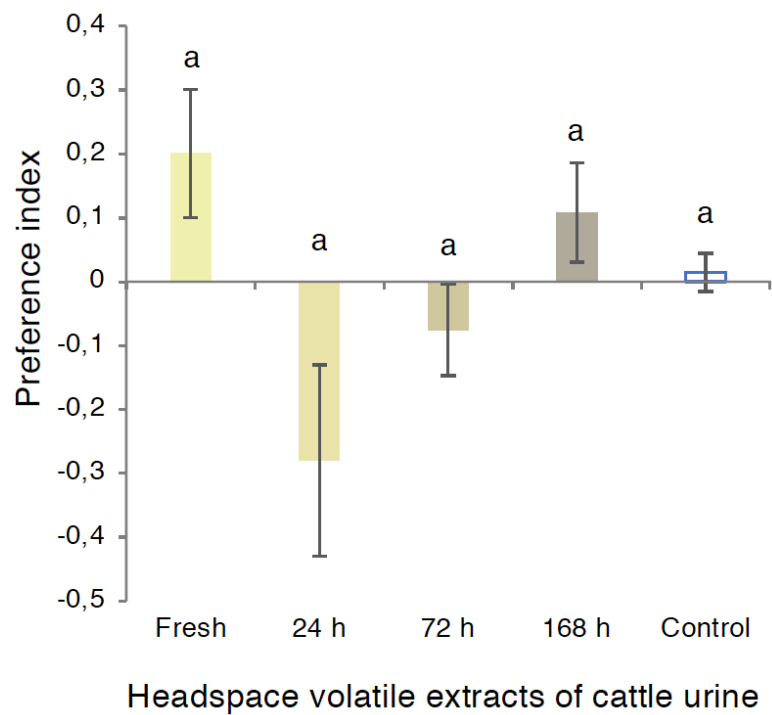

**Supporting Fig 1**

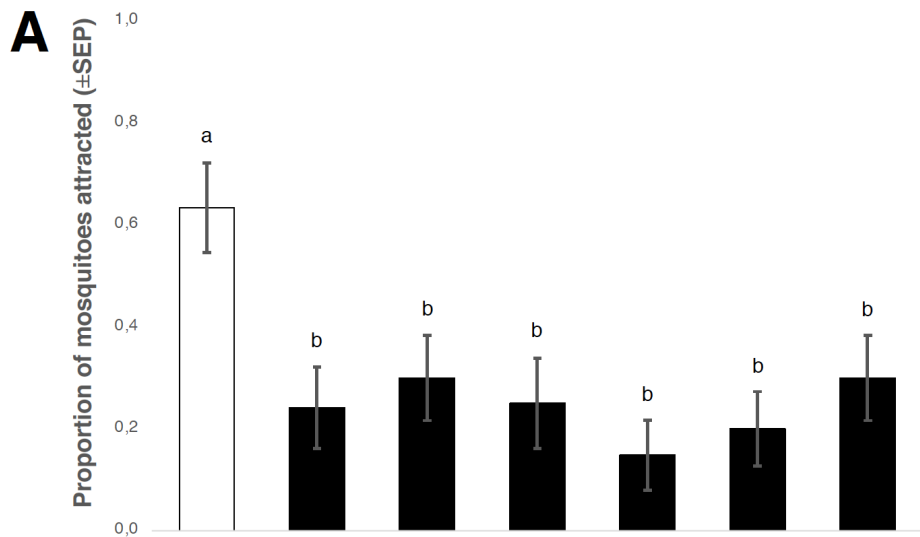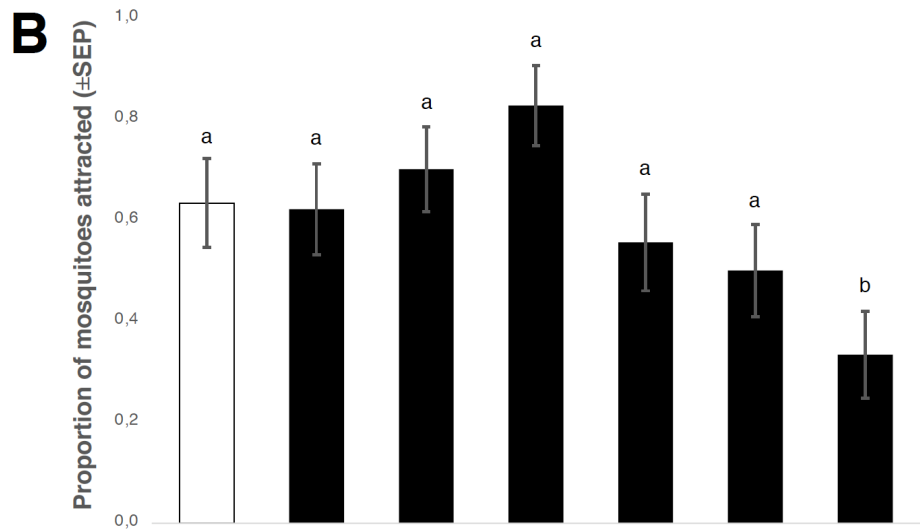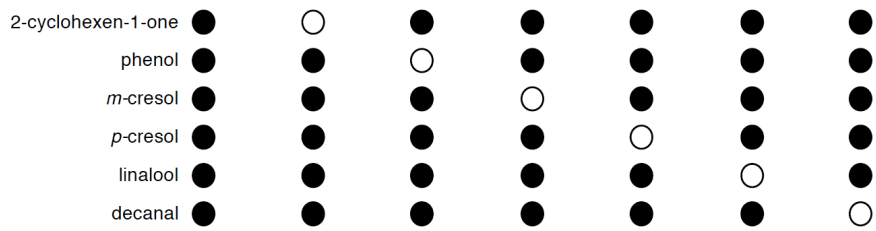

Supporting Fig 2.

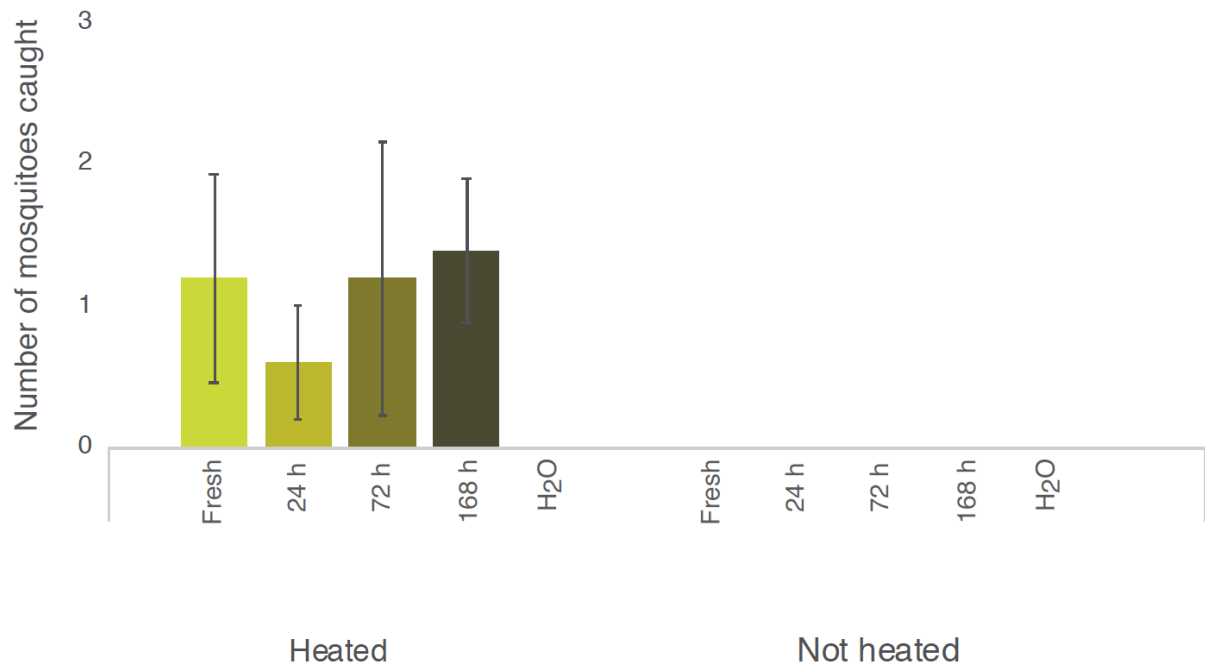

**Supplementary Figure 3. Cattle urine enhances host decoy trap catches only in the presence of the host cue, heat.** Host decoy traps only caught malaria mosquitoes in a deserted pasture between the breeding site and the village in the presence of both heat and cattle urine (fresh or aged), but not either alone. Error bars indicate the standard error of the mean.
